# Supplementary material for: Peripapillary choroidal thickness after intravitreal ranibizumab injections in eyes with neovascular age-related macular degeneration
Source: Springer Nature journal article supplement (doi:10.1186/s12886-016-0203-7), 2016-03-08
Supplement: MOESM1 [file 9746742]

Additional table 1. Comparison of choroidal thickness between neovascular AMD eyes at 3 and 6 months and normal controls.

|                       | Control group | AMD group at 3 months | <i>P</i> value* | AMD group at 6 months | <i>P</i> value* |
|-----------------------|---------------|-----------------------|-----------------|-----------------------|-----------------|
| Subfoveal CT (μm)     | 224.2 ± 54.7  | 213.8 ± 75.5          | 0.489           | 214.1 ± 72.8          | 0.493           |
| Peripapillary CT (μm) |               |                       |                 |                       |                 |
| Mean                  | 148.2 ± 38.8  | 149.6 ± 43.8          | 0.882           | 150.0 ± 43.4          | 0.869           |
| Superior              | 160.3 ± 42.6  | 162.2 ± 48.7          | 0.857           | 162.6 ± 47.8          | 0.824           |
| Nasal                 | 148.3 ± 36.5  | 151.6 ± 43.3          | 0.719           | 150.8 ± 42.7          | 0.781           |
| Inferior              | 122.7 ± 32.5  | 125.1 ± 38.3          | 0.765           | 125.9 ± 37.5          | 0.694           |
| Temporal              | 161.4 ± 49.8  | 159.4 ± 50.8          | 0.859           | 160.6 ± 49.6          | 0.872           |

Continuous variables are expressed as mean ± standard deviation.

\*Comparison of parameters between the control group and AMD group, *P* value was based on student t-test

CT, choroidal thickness
