# Supplementary material for: Peripapillary choroidal thickness after intravitreal ranibizumab injections in eyes with neovascular age-related macular degeneration
Source: Springer Nature journal article supplement (doi:10.1186/s12886-016-0203-7), 2016-03-08
Supplement: MOESM2 [file 9746742]

Additional table 2. Interobserver measurement reliability of the choroidal thickness.

|                  | Correlation coefficient | 95% confidence interval |
|------------------|-------------------------|-------------------------|
| Subfoveal CT     | 0.963                   | 0.943 – 0.976           |
| Peripapillary CT |                         |                         |
| Superior         | 0.952                   | 0.937 – 0.965           |
| Nasal            | 0.964                   | 0.951 – 0.976           |
| Inferior         | 0.940                   | 0.925 – 0.954           |
| Temporal         | 0.984                   | 0.971 – 0.996           |

CT, choroidal thickness.
